# Supplementary material
Source: Springer Nature journal article supplement (https://www.springermedizin.de/resource/supplementary/13023_2006_24_MOESM1_ESM.pdf/9641476)

**Figure 1: Systemic prostaglandin E-M in the urine before and after naproxen treatment in all patients**

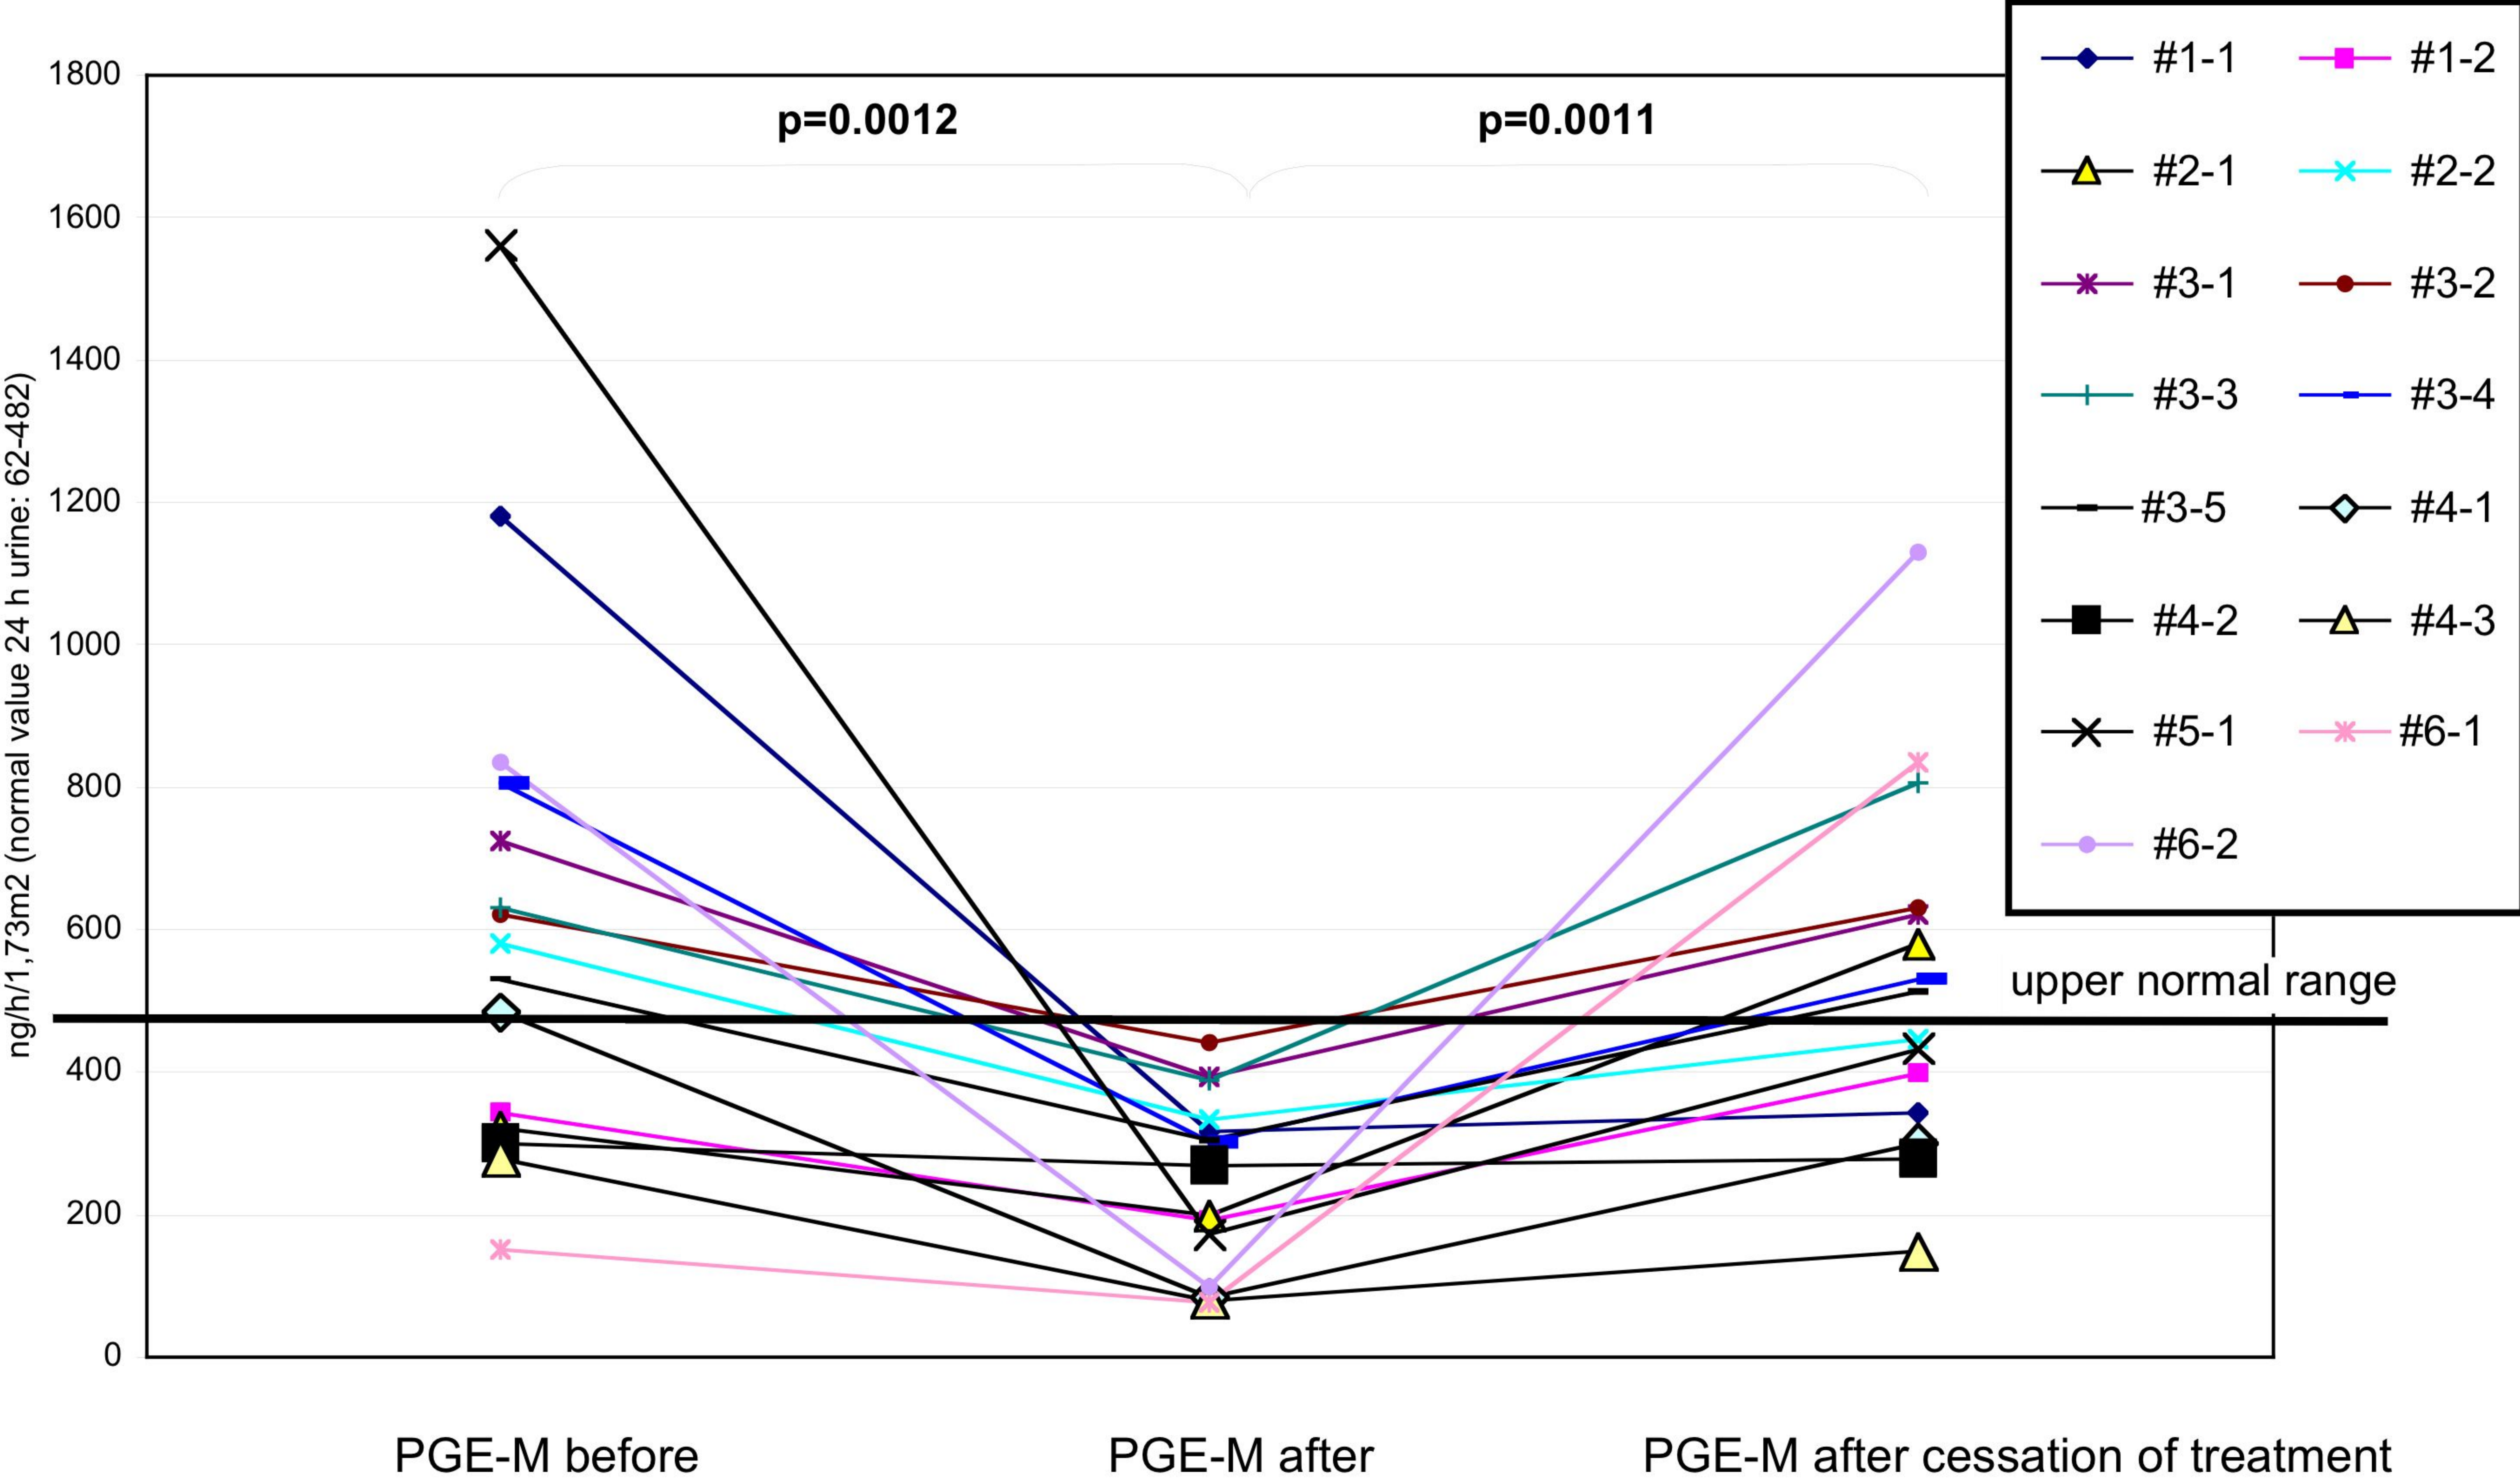

Supplement: MOESM1 [file 9641476]
